# Supplementary material for: Consensus goals and standards for specialist cough clinics: the NEUROCOUGH international Delphi study
Source: PubMed Central journal article supplement (PMC10658629; doi:10.1183/23120541.00618-2023), 2023-11-20
Supplement: 00618-2023.SUPPLEMENT.pdf [file 00618-2023.SUPPLEMENT.pdf]

## Online Repository

### TITLE: Consensus Goals and Standards for Specialist Cough Clinics: the NEUROCOUGH International Delphi Study

Table E1. List of original statement and survey item draft

|                                                                                                                                                                                                                                                                                                                                                                                                                                                                                                                                                                                                 |
|-------------------------------------------------------------------------------------------------------------------------------------------------------------------------------------------------------------------------------------------------------------------------------------------------------------------------------------------------------------------------------------------------------------------------------------------------------------------------------------------------------------------------------------------------------------------------------------------------|
| 1. Statement: Specialist cough clinics should be set up to provide the optimal care for patients with cough.                                                                                                                                                                                                                                                                                                                                                                                                                                                                                    |
| 2. Statement: Aims of specialist cough clinics should be to improve patient outcomes, avoid inappropriate investigations and treatments, and advance clinical research and drug development.                                                                                                                                                                                                                                                                                                                                                                                                    |
| 3. Statement: Cough clinics should be supervised by clinicians with expertise in cough management.                                                                                                                                                                                                                                                                                                                                                                                                                                                                                              |
| 4. Statement: Cough clinics should provide evaluation and management of patients according to the agreed procedures defined by national and/or international consensus.                                                                                                                                                                                                                                                                                                                                                                                                                         |
| 5. Statement: Cough clinics should be established in every secondary respiratory or allergy care facility.                                                                                                                                                                                                                                                                                                                                                                                                                                                                                      |
| 6. Statement: In cough clinics, cough should be routinely assessed using validated, or at least structured cough measurement tools.                                                                                                                                                                                                                                                                                                                                                                                                                                                             |
| 6-1. Item importance rating: Please rate the importance of each established item as a routine assessment tool in cough clinics.<br><ul style="list-style-type: none"><li>① Cough severity numerical rating scale (e.g., 0-10 score or modified Borg scale)</li><li>② Cough severity visual analogue scale (e.g., 0-100 mm)</li><li>③ Cough frequency (ambulatory cough monitoring)</li><li>④ Cough-specific impact or QoL (e.g., LCQ or CQLQ)</li><li>⑤ Generic health QoL (e.g., EuroQoL or SF-36)</li><li>⑥ Airway Reflux Questionnaire (e.g., HARQ)</li><li>⑦ Cough severity diary</li></ul> |
| 6-2. Item importance rating: Please rate the importance of each item as additional measure that should be routinely used in cough clinics, although the assessment tool                                                                                                                                                                                                                                                                                                                                                                                                                         |

may need development or validation.

- ① Subjective cough frequency
- ② Cough intensity
- ③ Cough triggers
- ④ Cough complications such as tiredness, pain, incontinence, sleep disturbance, work ability, family life
- ⑤ Urge to cough
- ⑥ Throat sensations

7. Statement: In every patient newly referred with chronic cough, a minimum panel of routine tests should be undertaken (or reviewed).

7-1. Item importance rating: Please rate the importance of each item as a routine test to undertake or review in every newly referred patient with chronic cough.

- ① Chest X-ray
- ② Spirometry
- ③ Reversibility test
- ④ FeNO
- ⑤ Blood eosinophils
- ⑥ Sputum eosinophils
- ⑦ Allergy skin test (or serum specific IgE test)
- ⑧ Methacholine challenge test
- ⑨ Mannitol challenge test
- ⑩ Sinus imaging
- ⑪ Nasal endoscopy
- ⑫ Laryngoscopy
- ⑬ 24-hr esophageal pH
- ⑭ High resolution esophageal manometry
- ⑮ GI endoscopy
- ⑯ Cough challenge test
- ⑰ Bronchoscopy

8. Statement: Decision to commence opiates (as anti-tussives) should be carefully made by cough specialist physicians.

9. Statement: Decision to commence current neuromodulators (such as gabapentin or amitriptyline, as anti-tussives) should be carefully made by cough specialist physicians.

10. Statement: In cough clinics, cough control therapy, or speech language and pathology therapy, should be accessible.

11. Statement: In cough clinics, multi-disciplinary team meetings should take place regularly to discuss appropriate patients.

12. Statement: Where possible, cough clinics should provide an opportunity for patients to participate in clinical trials of novel cough therapies.

13. Statement: Cough clinics should participate in local and international audit on an ongoing basis with the aim of providing high-quality cough services.

13-1. Item importance rating: Please rate the importance of each item as a quality indicator for cough clinical service.

- ① Presence of clinicians with expertise in cough management
- ② Adherence to the agreed procedures defined by national and/or international consensus in patient management
- ③ Quantification of baseline cough severity or impact using established tools
- ④ Quantification of treatment response at follow up consultation using established tools
- ⑤ Accessibility to chest X-ray
- ⑥ Accessibility to spirometry
- ⑦ Accessibility to FeNO, blood eosinophils, or sputum eosinophils
- ⑧ Accessibility to allergy skin test (or serum specific IgE test)
- ⑨ Accessibility to methacholine or mannitol challenge test
- ⑩ Accessibility to sinus imaging and nasal endoscopy
- ⑪ Accessibility to laryngoscopy
- ⑫ Accessibility to 24-hr esophageal pH
- ⑬ Accessibility to High resolution esophageal manometry
- ⑭ Accessibility to GI endoscopy
- ⑮ Accessibility to Cough challenge test
- ⑯ Accessibility to Bronchoscopy
- ⑰ Accessibility to Cough control therapy (or speech language and pathology

therapy)

⑱ Multidisciplinary team

14. Statement: Cough evaluation and management should be integrated into the post graduate specialty (e.g., respiratory or allergy) training curriculum.

15. Statement: Specialty trainees/fellows (e.g., respiratory or allergy) should be required to undertake a period of training/participate in clinics which regularly receive referrals for chronic cough.

Table E2. List of 57 panelists

| Country   | Panelist                                                                                                                                                                                                                                                                                                                                                                                                                                                                                                                                                                                                                                                                                                                                                                                                                                                                                        |
|-----------|-------------------------------------------------------------------------------------------------------------------------------------------------------------------------------------------------------------------------------------------------------------------------------------------------------------------------------------------------------------------------------------------------------------------------------------------------------------------------------------------------------------------------------------------------------------------------------------------------------------------------------------------------------------------------------------------------------------------------------------------------------------------------------------------------------------------------------------------------------------------------------------------------|
| Australia | Peter Gibson (Department of Respiratory and Sleep Medicine, John Hunter Hospital, Newcastle, NSW, Australia; Priority Research Centre for Healthy Lungs, The University of Newcastle)                                                                                                                                                                                                                                                                                                                                                                                                                                                                                                                                                                                                                                                                                                           |
| Belgium   | Charlotte Van de Kerkhove (Respiratory Oncology Unit (Respiratory Diseases), University Hospital KU Leuven)<br>Lieven Dupont (Department of Pneumology, UZ Leuven, Leuven, Belgium; Respiratory Diseases and Thoracic Surgery, Department of Chronic Diseases and Metabolism, KU Leuven)                                                                                                                                                                                                                                                                                                                                                                                                                                                                                                                                                                                                        |
| Canada    | Andréanne Côté (Institut de recherche de cardiologie et de pneumologie de Québec-université Laval)<br>Andrew Thamboo (Division of Otolaryngology- Head & Neck Surgery, University of British Columbia)<br>Diane Lougheed (Department of Medicine, Queen's University Ringgold standard institution)<br>Imran Satia (Department of Medicine, McMaster University)<br>Louis-Philippe Boulet (Quebec Heart and Lung Institute, Laval University)<br>Michael Cyr (Division of Clinical Immunology & Allergy, McMaster University)<br>Parameswaran Nair (Division of Respiriology, St Joseph's Healthcare and McMaster University)<br>Patrick Mitchell (Division of Respiriology, Department of Medicine, McMaster University)<br>Stephen K. Field (Division of Respiratory Medicine, Cumming School of Medicine, University of Calgary)<br>Terence Ho (Department of Medicine, McMaster University) |
| China     | Kefang Lai (The First Affiliated Hospital of Guangzhou Medical University)<br>Zhongmin Qiu (Department of Respiratory Medicine, Shanghai Tongji Hospital)                                                                                                                                                                                                                                                                                                                                                                                                                                                                                                                                                                                                                                                                                                                                       |
| Finland   | Anne Lähti (School of Medicine, Faculty of Health Sciences, University of Eastern Finland)<br>Hanna Nurmi (School of Medicine, Faculty of Health Sciences, University of Eastern Finland)<br>Heikki Koskela (School of Medicine, Faculty of Health Sciences, University of Eastern Finland)                                                                                                                                                                                                                                                                                                                                                                                                                                                                                                                                                                                                     |
| France    | Laurent Guilleminault (Department of respiratory and allergic diseases, Toulouse University, Hospital Center)                                                                                                                                                                                                                                                                                                                                                                                                                                                                                                                                                                                                                                                                                                                                                                                   |
| Germany   | Ludger Klimek (Center for Rhinology and Allergology, Wiesbaden)<br>Peter Kardos (Centre of Allergy, Respiratory and Sleep Medicine, Maingau Clinic of the Red Cross, Frankfurt am Main)                                                                                                                                                                                                                                                                                                                                                                                                                                                                                                                                                                                                                                                                                                         |

|             |                                                                                                                                                                                                                                                                                                                                                                                                                                                                                                                                                             |
|-------------|-------------------------------------------------------------------------------------------------------------------------------------------------------------------------------------------------------------------------------------------------------------------------------------------------------------------------------------------------------------------------------------------------------------------------------------------------------------------------------------------------------------------------------------------------------------|
| Israel      | Ram Mor (Pulmonary Institute, The Haim Sheba Medical Center)                                                                                                                                                                                                                                                                                                                                                                                                                                                                                                |
| Italy       | Giovanni Fontana (Department of Experimental and Clinical Medicine, University of Florence)                                                                                                                                                                                                                                                                                                                                                                                                                                                                 |
| Japan       | Akio Niimi (Department of Respiratory Medicine, Allergy and Clinical Immunology, Nagoya City University Graduate School of Medical Sciences)<br>Hisako Matsumoto (Department of Respiratory Medicine & Allergology, Kindai University Faculty of Medicine)                                                                                                                                                                                                                                                                                                  |
| Korea       | Byung Jae Lee (Division of Allergy, Department of Medicine, Samsung Medical Center, Sungkyunkwan University School of Medicine)<br>Sang Heon Cho (Division of Allergy and Clinical Immunology, Department of Internal Medicine, Seoul National University College of Medicine)<br>Woo-Jung Song (Asan Medical Center, University of Ulsan College of Medicine)<br>Yoon Seok Chang (Division of Allergy and Clinical Immunology, Department of Internal Medicine, Seoul National University Bundang Hospital, Seoul National University College of Medicine) |
| Latvia      | Madara Tīrzīte (Rīga Stradiņš University)                                                                                                                                                                                                                                                                                                                                                                                                                                                                                                                   |
| Netherlands | Jan Willem K van den Berg (Isala Hospital)                                                                                                                                                                                                                                                                                                                                                                                                                                                                                                                  |
| Poland      | Adam Barczyk (Department of Pneumology, Medical University of Silesia)<br>Ewa Jassem (Department of Pneumology, Medical University of Gdansk)<br>Marta Dąbrowska (Department of Internal Medicine, Pulmonary Diseases and Allergy, Medical University of Warsaw)                                                                                                                                                                                                                                                                                            |
| Slovakia    | Renata Péčová (Department of Pathophysiology, Jessenius Faculty of Medicine, Comenius University in Bratislava)                                                                                                                                                                                                                                                                                                                                                                                                                                             |
| Spain       | Christian Domingo Ribas (Pulmonary Service, Corporació Sanitària Parc Taulí (Sabadell), Dept of Medicine, Universitat Autònoma de Barcelona)<br>Gonzalez-Barcala Francisco-Javier (Department of Respiratory Medicine, Hospital Clínico Universitario de Santiago de Compostela)                                                                                                                                                                                                                                                                            |
| Sweden      | Eva Millqvist (Department of Internal Medicine/Respiratory Medicine and Allergology, Sahlgrenska University Hospital, University of Gothenburg)<br>Össur Ingi Emilsson (Department of Medical Sciences, Respiratory, Allergy and Sleep Research, Uppsala University and Department of Respiratory Medicine, Akademiska sjukhuset)                                                                                                                                                                                                                           |
| UK          | Alice Turner (Institute for Applied Health Research, University of Birmingham)<br>Alyn H Morice (Hull York Medical School, University of Hull, Castle Hill Hospital)<br>Chris Brightling (Institute for Lung Health, Leicester NIHR BRC, University of Leicester)<br>Ian Pavord (Respiratory Medicine Unit and Oxford Respiratory NIHR BRC, Nuffield Department of Clinical Medicine, University of Oxford)<br>Jaclyn A Smith (University of Manchester and Manchester University NHS Foundation)                                                           |

|    |                                                                                                                                                                                                                                                                                                                                                                                                                                                                                                                                                                                                                                                                                                                                                      |
|----|------------------------------------------------------------------------------------------------------------------------------------------------------------------------------------------------------------------------------------------------------------------------------------------------------------------------------------------------------------------------------------------------------------------------------------------------------------------------------------------------------------------------------------------------------------------------------------------------------------------------------------------------------------------------------------------------------------------------------------------------------|
|    | <p>Trust)</p> <p>James H Hull (Royal Brompton Hospital)</p> <p>Kian Fan Chung (Experimental Studies Unit, National Heart &amp; Lung Institute, Imperial College London)</p> <p>Lorcan P McGarvey (Wellcome-Wolfson Institute for Experimental Medicine, School of Medicine, Dentistry and Biomedical Sciences, Queen's University Belfast)</p> <p>Sean Parker (Northumbria Healthcare NHSFT, North Tyneside General Hospital)</p> <p>Surinder Birring (Centre for Human and Applied Physiological Sciences, School of Basic and Medical Biosciences, Faculty of Life Sciences and Medicine, King's College London)</p> <p>Tim Harrison (University of Nottingham)</p>                                                                                |
| US | <p>Alan Goldsobel (Allergy and Asthma Associates of Northern California)</p> <p>Krishna M Sundar (Division of Pulmonary &amp; Critical Care Medicine, University of Utah)</p> <p>Mandel R Sher (Division of Allergy and Immunology, Department of Pediatrics, Morsani College of Medicine, University of South Florida)</p> <p>Peter Dicipinigaitis (Albert Einstein College of Medicine and Montefiore Medical Center Bronx)</p> <p>Rachel Taliercio (Departments of Pulmonary Medicine and Critical Care Medicine, Cleveland Clinic Lerner College of Medicine of Case Western Reserve University)</p> <p>Vivek Iyer (Division of Pulmonary and Critical Care Medicine, Mayo Clinic)</p> <p>William Storms (The William Storms Allergy Clinic)</p> |
